# Supplementary material for: A novel BH3 ligand that selectively targets Mcl-1 reveals that apoptosis can proceed without Mcl-1 degradation
Source: PubMed Central journal article supplement — J Cell Biol. 2008 Jan 28;180(2):341–55. doi: 10.1083/jcb.200708096 (PMC2213596; doi:10.1083/jcb.200708096), 2008-01-28
Supplement: jcellbiol_jcb.200708096_6.pdf [file jcellbiol_jcb.200708096_6.pdf]

Table S1. **Crystallographic statistics****Data collection**

---

|                               |                            |
|-------------------------------|----------------------------|
| Space group                   | 1,222                      |
| Cell dimensions $a, b, c$ (Å) | 51.17, 69.64, 120.65       |
| Wavelength (Å)                | 1.5418                     |
| Resolution range (Å)          | 50.00 – 2.03 (2.10 – 2.03) |
| $R_{merge}$                   | 0.044 (0.204)              |
| $I/\sigma I$                  | 31.2 (5.61)                |
| Completeness (%)              | 98.4 (96.1)                |
| Redundancy                    | 3.2 (3.1)                  |

**Refinement**

|                            |                              |
|----------------------------|------------------------------|
| Resolution (Å)             | 60.3 – 2.03<br>(2.09 – 2.03) |
| No. reflections $R_{work}$ | 13,365 (965)                 |
| No. reflections $R_{free}$ | 710 (49)                     |
| $R_{work}$                 | 0.19 (0.21)                  |
| $R_{free}$                 | 0.24 (0.27)                  |
| No. atoms                  |                              |

|            |       |
|------------|-------|
| Protein    | 1,163 |
| Peptide    | 193   |
| Water/ions | 136   |

## Rms deviations

|                  |       |
|------------------|-------|
| Bond lengths (Å) | 0.015 |
| Bond angles (°)  | 1.181 |
| Chiral           | 0.084 |

---

Numbers in parentheses represent statistics for highest resolution shell.
